# Supplementary material for: Effect of Repeated Consumption of Partially Hydrolyzed Guar Gum on Fecal Characteristics and Gut Microbiota: A Randomized, Double-Blind, Placebo-Controlled, and Parallel-Group Clinical Trial
Source: PubMed Central journal article supplement (PMC6769658; doi:10.3390/nu11092170), 2019-09-10
Supplement: nutrients-11-02170-s001.pdf [file nutrients-11-02170-s001.pdf]

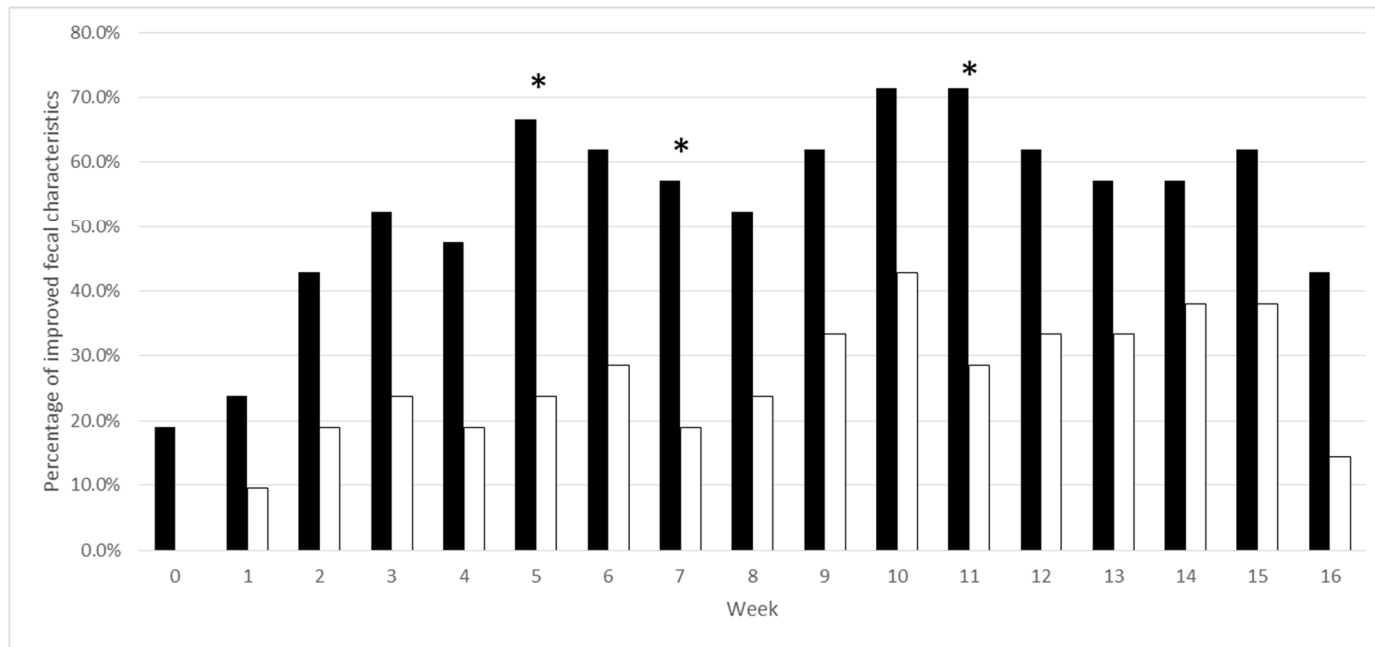

**Figure S1.** Variation in percentage of subjects with improved fecal characteristics data minded at above 50% of Bristol Stool Score (BSS) at level 4. Solid bars and open bars denote mean values for PHGG and placebo groups, respectively. PHGG group: n=21, placebo group: n=21. (\*p<0.05, Chi-square test.).

**Table S1.** Comprehensive statistics of the SF-8 scores of QOL-questionnaire from respondents (n = 42).

|                           | Physical function |                | Role physical  |                | Bodily pain    |                | General health |                | Vitality       |                | Social functioning |                | Role emotional |                | Mental health  |                |
|---------------------------|-------------------|----------------|----------------|----------------|----------------|----------------|----------------|----------------|----------------|----------------|--------------------|----------------|----------------|----------------|----------------|----------------|
|                           | PHGG              | Placebo        | PHGG           | Placebo        | PHGG           | Placebo        | PHGG           | Placebo        | PHGG           | Placebo        | PHGG               | Placebo        | PHGG           | Placebo        | PHGG           | Placebo        |
| Baseline (0 W)            | 51.59±3<br>.41    | 51.59±3<br>.41 | 52.18±3<br>.09 | 51.87±3<br>.22 | 50.92±7<br>.89 | 51.08±7<br>.86 | 53.57±5<br>.42 | 53.41±5<br>.68 | 50.97±5<br>.76 | 51.56±6<br>.34 | 52.04±5<br>.28     | 52.11±5<br>.88 | 51.00±4<br>.10 | 49.86±4<br>.71 | 52.26±4<br>.24 | 48.92±7<br>.90 |
|                           | p=1.000           |                | p=0.746        |                | p=0.949        |                | p=0.924        |                | p=0.751        |                | p=0.965            |                | p=0.409        |                | p=0.098        |                |
| Intake period 1<br>(4 W)  | 52.41±3<br>.05    | 52.41±3<br>.05 | 51.86±3<br>.87 | 51.86±3<br>.87 | 56.51±5<br>.87 | 54.17±7<br>.54 | 53.74±5<br>.14 | 51.92±5<br>.71 | 51.25±5<br>.24 | 50.82±6<br>.21 | 52.44±5<br>.11     | 49.99±7<br>.18 | 52.17±3<br>.96 | 49.35±6<br>.00 | 52.87±4<br>.80 | 49.08±7<br>.71 |
|                           | p=1.000           |                | p=1.000        |                | p=0.269        |                | p=0.286        |                | p=0.811        |                | p=0.202            |                | p=0.080        |                | p=0.064        |                |
| Intake period 2<br>(8 W)  | 51.87±3<br>.32    | 50.74±4<br>.05 | 52.18±3<br>.75 | 50.59±4<br>.55 | 53.65±6<br>.84 | 52.51±8<br>.43 | 52.87±5<br>.78 | 54.20±5<br>.76 | 50.97±6<br>.19 | 50.68±6<br>.22 | 53.40±4<br>.61     | 49.16±7<br>.56 | 51.59±4<br>.08 | 48.85±7<br>.27 | 53.15±4<br>.48 | 50.36±8<br>.25 |
|                           | p=0.331           |                | p=0.224        |                | p=0.633        |                | p=0.461        |                | p=0.883        |                | p=0.035            |                | p=0.142        |                | p=0.183        |                |
| Intake period 3<br>(12 W) | 52.44±2<br>.32    | 51.29±3<br>.99 | 51.22±4<br>.53 | 51.54±4<br>.49 | 53.13±5<br>.87 | 52.13±6<br>.73 | 54.53±5<br>.19 | 54.59±5<br>.76 | 50.81±5<br>.40 | 51.28±6<br>.79 | 53.78±3<br>.42     | 49.97±7<br>.68 | 51.29±4<br>.10 | 49.11±6<br>.86 | 51.96±4<br>.11 | 49.37±8<br>.65 |
|                           | p=0.262           |                | p=0.821        |                | p=0.613        |                | p=0.969        |                | p=0.806        |                | p=0.047            |                | p=0.219        |                | p=0.225        |                |

Welch's t-test (between groups).
